# Supplementary material
Source: PubMed Central journal article supplement (PMC7407532)
Supplement: ao0c00897_si_001.pdf [file ao0c00897_si_001.pdf]

## Supplementary Information

### Effect of paclitaxel in the water dynamics of MCF-7 breast cancer cells revealed by dielectric spectroscopy

Murillo L. Martins<sup>\*,†,‡</sup>, Heloisa N. Bordallo<sup>†,‡</sup>, Silvia Arrese-Igor<sup>§</sup>, Angel Alegría<sup>§</sup>, Juan Colmenero de Leon<sup>§</sup>

<sup>†</sup> *System and Production Engineering Graduate Program, Pontifical Catholic University of Goias, 74605-010, Goiania, Brazil*

<sup>†</sup> *Niels Bohr Institute, University of Copenhagen, DK-2100, Copenhagen, Denmark*

<sup>‡</sup> *European Spallation Source, PO Box 176, SE-221 00, Lund, Sweden*

<sup>§</sup> *Centro de Física de Materiales, Centro Mixto CSIC-UPV/EHU, Paseo Manuel Lardizabal 5, 20018, San Sebastián, Spain*

\* **Corresponding author:** longomartiml@ornl.gov

<sup>‡</sup> **Present address:** Neutron Scattering Division, Oak Ridge National Laboratory, P.O. Box 2008 MS6455, Oak Ridge, Tennessee 37831, United States

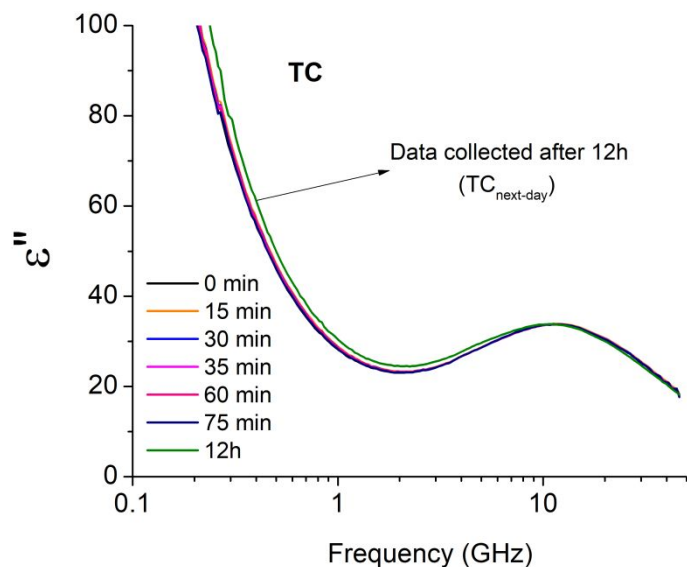

Figure S1. Imaginary part of the dielectric response for the TC exposed to room temperature after 0, 15, 30, 45, 60, and 75min and after 12h. The latter was named TC<sub>next-day</sub>.

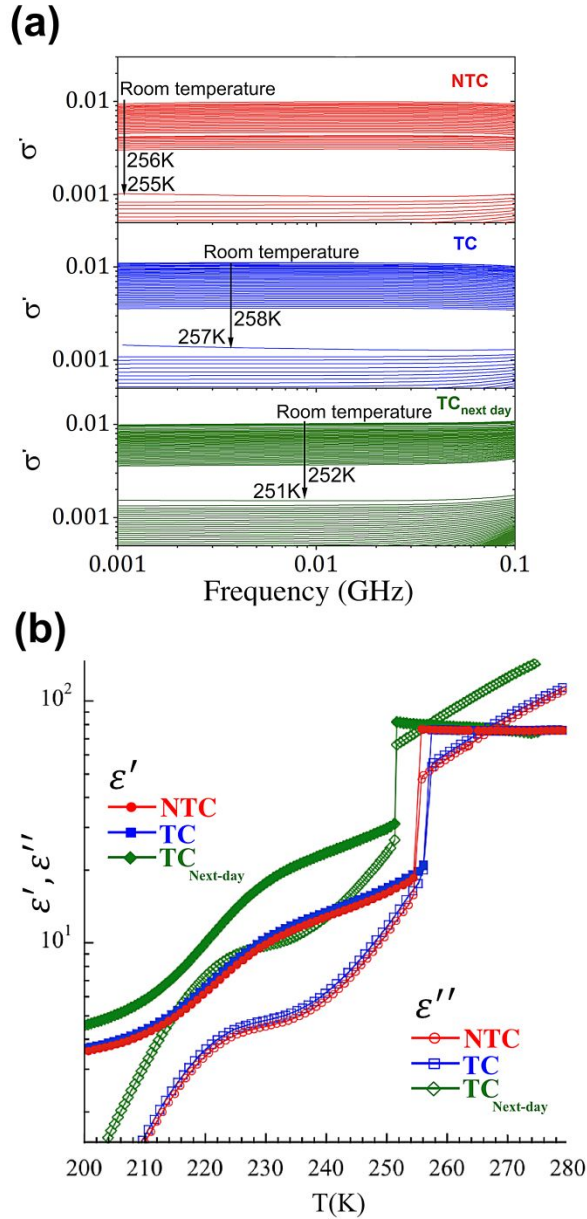

Figure S2. In (a), the real part of the conductivity measured at the radiofrequency range for the NTC, TC, and TC<sub>next-day</sub> on cooling. The monotonic decrease in conductivity ( $\sigma' = \epsilon''/2\pi f$ ) is broken at around 256K in the NTC, 258 K in the TC, and 252 K in the TC<sub>next-day</sub>. The temperatures where the conductivities abruptly drop are indicated for each sample. Panel (b) shows an isochronal representation of the complex permittivity at 0.1 GHz for the three samples; filled symbols correspond to the real parts and empty symbols to the losses.

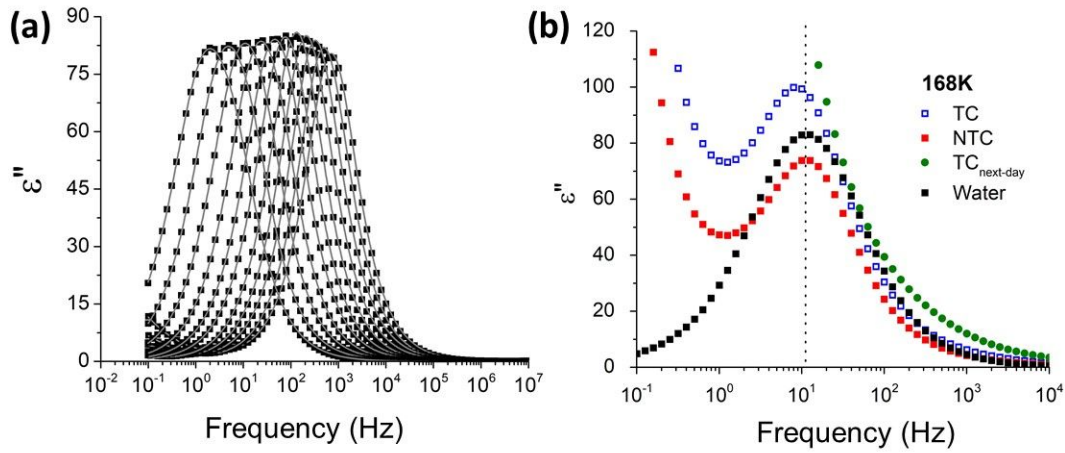

Figure S3. In (a), data collected with the broadband spectrometer for a sample of pure water between 205K and 145K highlighting the relaxations related to motions of protons in ice Ih. In (b), the relaxations related to motions of protons in ice Ih at 168K from the NTC and the TC are compared to that in pure water. Data from TC<sub>next-day</sub> is also presented but such relaxation is not observed in the used scale due to the higher DC conductivity contribution. The vertical dotted line is a guide for the eyes and indicates the frequency where the relaxations in the NTC and water reach their maximum.
